# Supplementary material for: Attempt to visualize terminal structure on a specific facet in polymer–metal complex nanocrystals
Source: Royal Society of Chemistry journal article supplement (doi:10.1039/c8ra02165a), 2018-01-01
Supplement: c8ra02165a1.pdf [file c8ra02165a1.pdf]

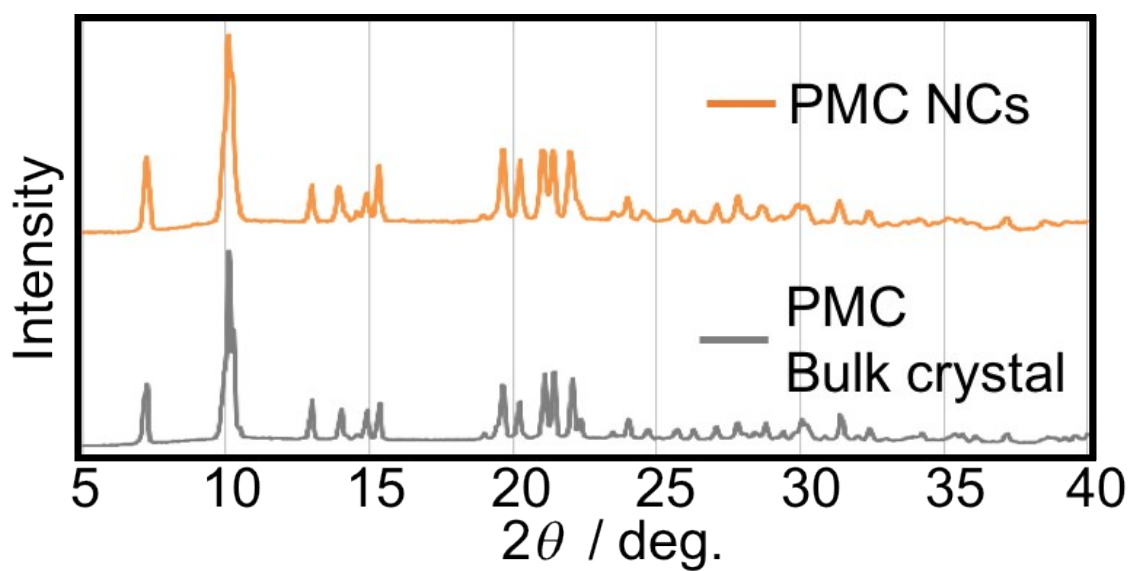

Fig. S1 Powder XRD patterns of  $[\{\text{Cu}_2(\mu\text{-Br})_2(\text{PPh}_3)_2\}(\mu\text{-bpy})]_n$ , called “PMC” in the Text, nanocrystals (NCs) and bulk crystal.

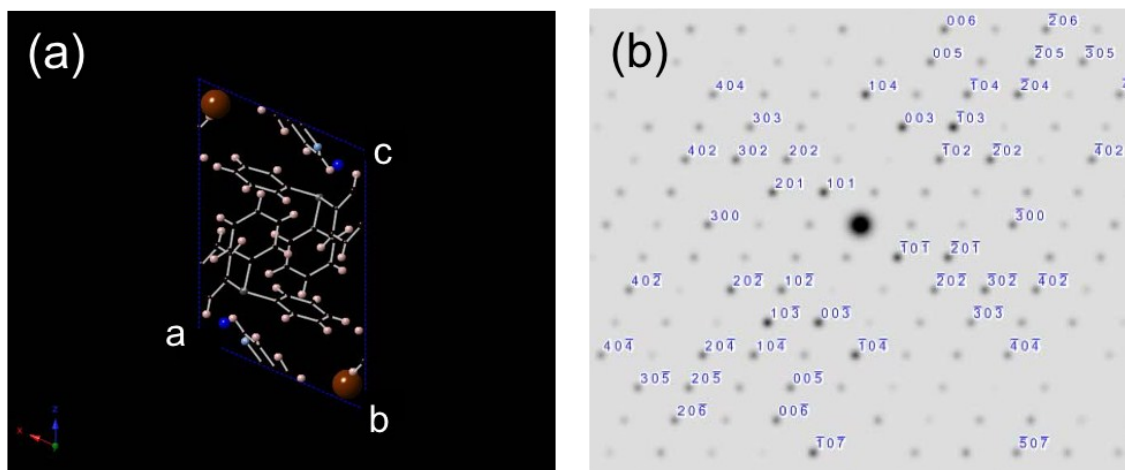

Fig. S2 (a) (010) plane projection drawing and (b) simulation of electron beam diffraction patterns in  $[\{\text{Cu}_2(\mu\text{-Br})_2(\text{PPh}_3)_2\}(\mu\text{-bpy})]_n$ , obtained by the simulation softs, “Crystal Maker X” and “Single Crystal 3”.
